# Supplementary material
Source: PubMed Central journal article supplement (PMC2758155)
Supplement: NIHMS134680-supplement-Suppl__Fig__2.pdf [file NIHMS134680-supplement-Suppl__Fig__2.pdf]

## Supplementary figure 2 Ubiquitin chain linkages

Ubiquitin K6 m/z 690.39 MQIFVK(GlyGly)TLTGK<sup>+2</sup>

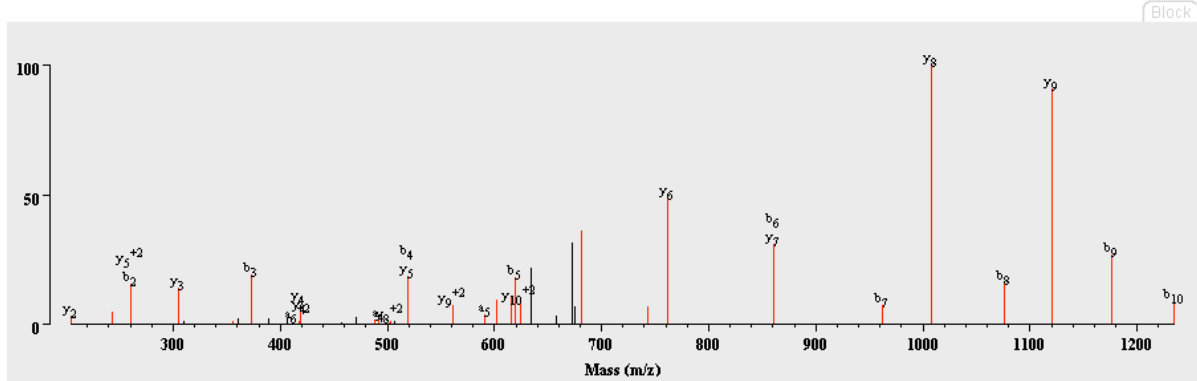

| m/z     | Ion Type       |
|---------|----------------|
| 204.219 | y2             |
| 243.083 | y5-2H2O+2      |
| 260.055 | b2             |
| 305.266 | y3             |
| 356.272 | b3-NH3         |
| 373.196 | y6-H2O+2       |
| 417.849 | a6+2           |
| 418.45  | y4             |
| 488.263 | y8-2NH3+2      |
| 491.438 | a4             |
| 501.191 | y5-H2O         |
| 503.492 | b4-NH3         |
| 519.302 | y5             |
| 560.973 | y9+2           |
| 591.297 | y10-H2O-3NH3+2 |
| 602.274 | b5-NH3         |
| 616.055 | y10-H2O+2      |
| 619.235 | b5             |
| 624.891 | y10+2          |
| 681.576 | MH-H2O+2       |
| 743.624 | y6-H2O         |
| 761.428 | y6             |
| 860.556 | y7             |
| 962.372 | b7             |
| 1007.62 | y8             |
| 1075.73 | b8             |
| 1120.71 | y9             |
| 1176.61 | b9             |
| 1233.72 | b10            |

# Ubiquitin K11 m/z 1201.64

TLTGK(GlyGly)TITLEVEPSDTIENVK<sup>+2</sup>

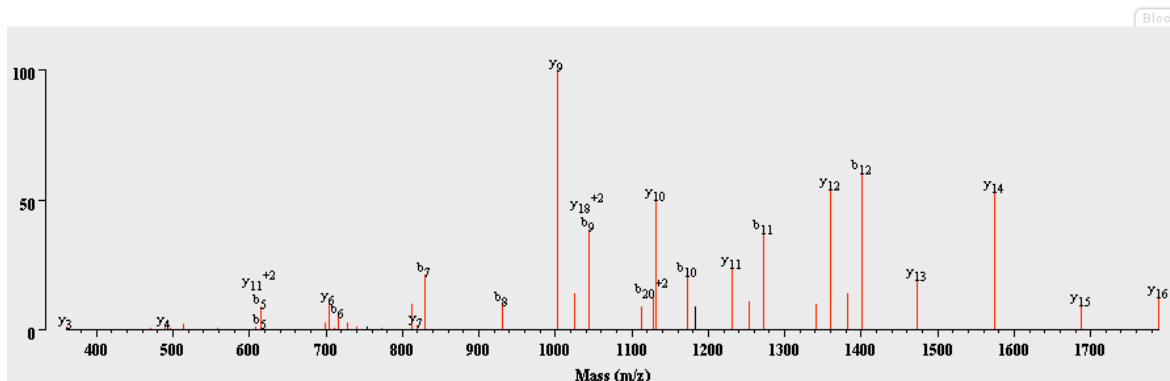

| m/z     | Ion Type        |
|---------|-----------------|
| 360.029 | y3              |
| 471.245 | y4-H2O          |
| 489.316 | y4              |
| 496.576 | b9-2H2O-NH3+2   |
| 514.329 | b9-NH3+2        |
| 558.437 | y10-NH3+2       |
| 607.308 | y11-H2O+2       |
| 614.796 | b5              |
| 615.512 | b5              |
| 698.369 | b6-H2O          |
| 703.41  | y6              |
| 710.372 | y13-3H2O+2      |
| 716.425 | y14-7H2O-NH3+2  |
| 728.586 | y13-H2O+2       |
| 740.484 | b13-H2O+2       |
| 773.63  | y15-6H2O-2NH3+2 |
| 811.444 | b16-9H2O-NH3+2  |
| 818.428 | y15-H2O-2NH3+2  |
| 829.441 | b16-8H2O+2      |
| 930.497 | y9-4H2O         |
| 1002.45 | y9              |
| 1025.5  | b19-6H2O+2      |
| 1043.45 | y10-4H2O-NH3    |
| 1113.52 | y10-H2O         |
| 1128.74 | b20+2           |
| 1131.54 | y10             |
| 1172.56 | b10             |
| 1230.53 | y11             |
| 1253.56 | y12-5H2O-NH3    |
| 1271.65 | y12-3H2O-2NH3   |
| 1341.6  | y12-H2O         |
| 1359.67 | y12             |
| 1382.67 | y13-5H2O        |

|         |          |
|---------|----------|
| 1400.72 | y13-4H2O |
| 1472.67 | y13      |
| 1573.81 | y14      |
| 1686.87 | y15      |
| 1788.06 | y16      |

**Ubiquitin K27 m/z 701.04**  
**TITLEVEPSDTIENVK(GlyGly)AK<sup>+3</sup>**

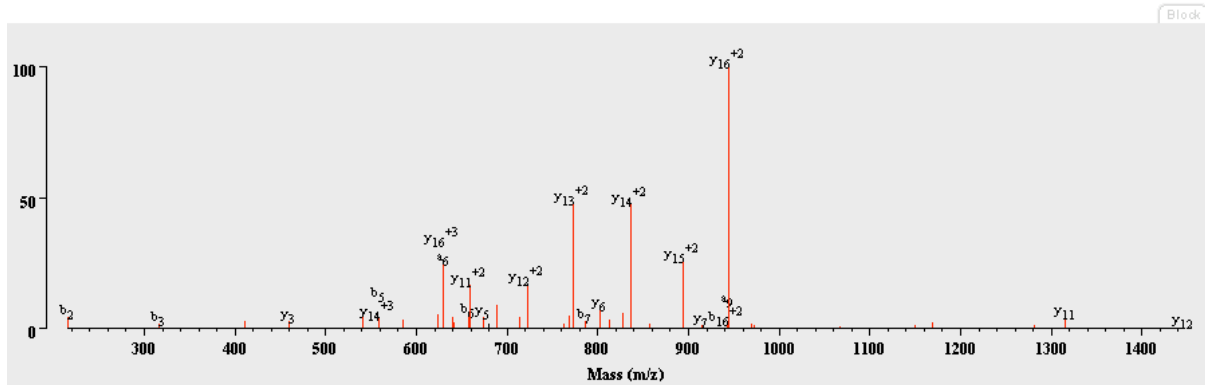

| m/z     | Ion Type        |
|---------|-----------------|
| 214.986 | b2              |
| 316.11  | y8-2H2O-2NH3+3  |
| 411.216 | b4-H2O          |
| 460.258 | y3              |
| 540.131 | y9-3H2O+2       |
| 558.133 | y10-3H2O-3NH3+2 |
| 584.991 | y10-3NH3+2      |
| 623.766 | y11-3H2O-NH3+2  |
| 629.778 | a6              |
| 639.252 | y17-2H2O-3NH3+3 |
| 641.441 | y11-H2O-NH3+2   |
| 657.087 | y5-NH3          |
| 658.645 | y11+2           |
| 673.294 | y5              |
| 689.28  | y12-H2O-3NH3+2  |
| 713.809 | y12-H2O+2       |
| 723.021 | y12+2           |
| 763.175 | y13-H2O+2       |
| 768.351 | y6-H2O-NH3      |
| 772.54  | y13+2           |
| 786.106 | y6-NH3          |
| 802.343 | y14-3H2O-NH3+2  |
| 812.345 | y14-3NH3+2      |

|         |                 |
|---------|-----------------|
| 827.213 | y14-H2O+2       |
| 828.071 | y14-H2O+2       |
| 837.04  | y14+2           |
| 857.776 | y15-4H2O+2      |
| 893.623 | y15+2           |
| 915.153 | b17-7H2O+2      |
| 942.669 | b17-4H2O+2      |
| 943.799 | b17-2H2O-2NH3+2 |
| 969.129 | b17-H2O+2       |
| 973.048 | y17-3H2O+2      |
| 1067.32 | b10-H2O         |
| 1150.35 | y10-H2O-3NH3    |
| 1168.39 | y10-3NH3        |
| 1281.51 | y11-H2O-NH3     |
| 1315.45 | y11             |
| 1444.62 | y12             |

**Ubiquitin K29 m/z 940.49**  
**AK(GlyGly)IQDK(Carbamyl)EGIPPDQQR<sup>+2</sup>**

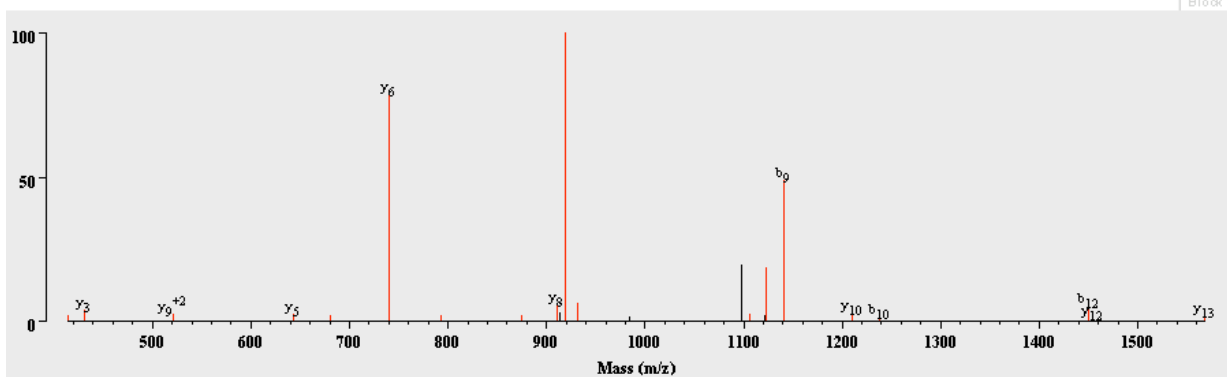

| m/z     | Ion Type        |
|---------|-----------------|
| 413.749 | y3-NH3          |
| 431.423 | y3              |
| 520.591 | y9+2            |
| 643.523 | y5              |
| 680.591 | b12-3H2O-2NH3+2 |
| 740.48  | y13-3H2O-2NH3+2 |
| 792.681 | b14-3H2O-4NH3+2 |
| 875.061 | y8-H2O-NH3      |
| 910.072 | y8              |
| 919.154 | b7-H2O-2NH3     |
| 931.753 | MH-H2O+2        |

|         |               |
|---------|---------------|
| 1105.56 | b9-2H2O       |
| 1123.3  | b9-H2O        |
| 1140.52 | y10-2H2O-2NH3 |
| 1210.81 | y10           |
| 1237.68 | y11-3H2O-2NH3 |
| 1449.82 | b12           |
| 1454.08 | y12           |
| 1567.19 | b14-3H2O-5NH3 |

**Ubiquitin K33 m/z 819.42**  
**IQDK(GlyGly)EGIPPDQQR<sup>+2</sup>**

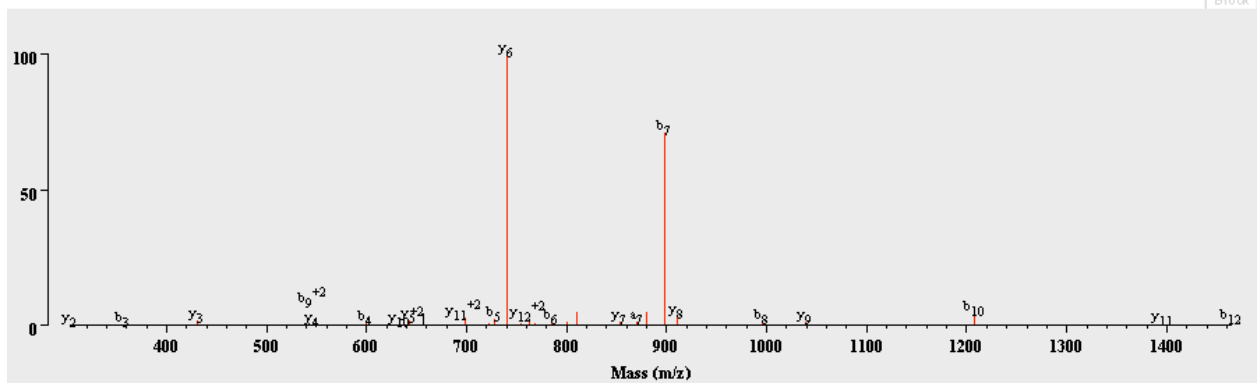

| m/z     | Ion Type        |
|---------|-----------------|
| 303.201 | y2              |
| 312.343 | y5-H2O+2        |
| 340.023 | b3-H2O          |
| 357.101 | b5-NH3+2        |
| 396.332 | y3-2NH3         |
| 413.265 | y3-NH3          |
| 430.217 | y8-H2O-2NH3+2   |
| 431.349 | y3              |
| 546.304 | y4              |
| 599.258 | y10-H2O-4NH3+2  |
| 615.278 | y10-2H2O-NH3+2  |
| 637.166 | y11-3H2O-4NH3+2 |
| 638.136 | y11-3H2O-4NH3+2 |
| 641.388 | b11-3H2O+2      |
| 643.252 | b11-H2O-2NH3+2  |
| 699.099 | b12-4NH3+2      |
| 722.202 | y6-H2O          |
| 728.145 | y12-3H2O-NH3+2  |

|         |             |
|---------|-------------|
| 740.306 | y6          |
| 754.122 | y12-H2O+2   |
| 762.502 | y12+2       |
| 768.286 | b6-H2O      |
| 785.198 | y7-H2O-3NH3 |
| 801.123 | y7-H2O-2NH3 |
| 810.634 | MH-H2O+2    |
| 853.451 | y7          |
| 870.191 | a7          |
| 880.261 | b7-H2O      |
| 898.313 | b7          |
| 910.32  | y8          |
| 995.561 | b8          |
| 1039.44 | y9          |
| 1207.38 | b10         |
| 1396.67 | y11         |
| 1463.63 | b12         |

## Ubiquitin K48 m/z 730.90

LIFAGK(GlyGly)QLEDGR<sup>+2</sup>

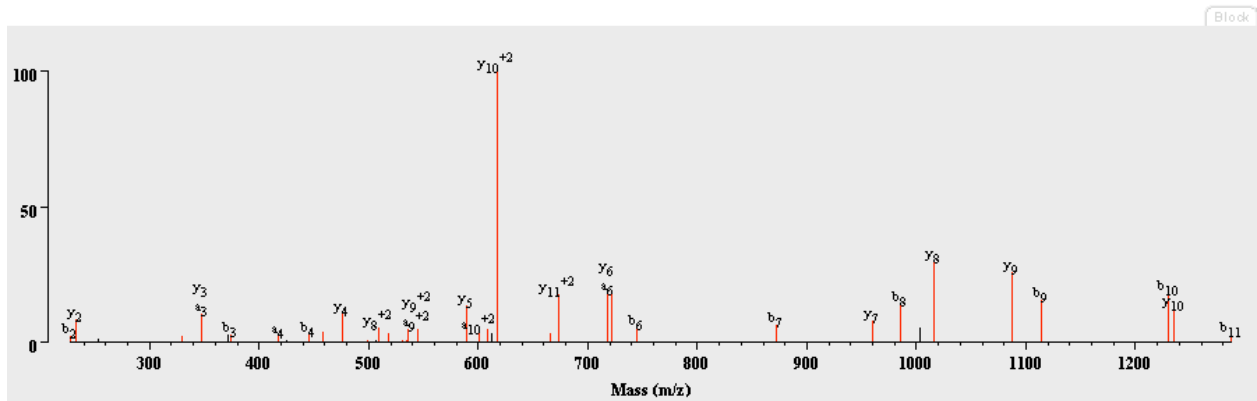

| m/z     | Ion Type       |
|---------|----------------|
| 227.035 | b2             |
| 232.226 | y2             |
| 329.056 | y3-H2O         |
| 347.192 | a3             |
| 374.198 | b3             |
| 417.162 | a4             |
| 445.293 | y7-2H2O-2NH3+2 |
| 458.313 | y4-H2O         |
| 476.285 | y4             |
| 499.484 | y8-H2O+2       |

|         |                 |
|---------|-----------------|
| 508.673 | y8+2            |
| 518.29  | y9-2H2O-NH3+2   |
| 531.38  | b9-H2O-2NH3+2   |
| 534.387 | y9-H2O+2        |
| 535.993 | y9-H2O+2        |
| 544.344 | a9+2            |
| 589.417 | b10-2H2O-NH3+2  |
| 600.492 | y10-2H2O+2      |
| 609.089 | b11-2H2O-2NH3+2 |
| 617.962 | b11-2H2O-NH3+2  |
| 665.391 | y6-H2O-2NH3     |
| 673.894 | y11+2           |
| 717.395 | a6              |
| 721.878 | MH-H2O+2        |
| 744.533 | b6              |
| 872.575 | y7-2H2O-3NH3    |
| 959.684 | y7              |
| 985.611 | b8              |
| 1016.61 | y8              |
| 1087.7  | y9              |
| 1114.63 | b9              |
| 1229.66 | b10             |
| 1234.81 | b11-H2O-2NH3    |
| 1286.62 | b11             |

**Ubiquitin K63 m/z 1122.61**  
**TLSDYNIQK(GlyGly)ESTLHLVLR<sup>+2</sup>**

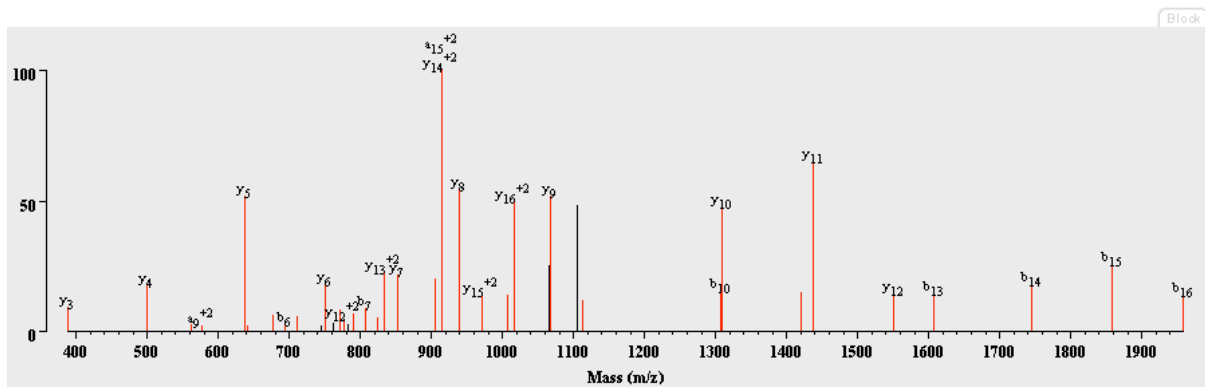

| m/z     | Ion Type |
|---------|----------|
| 387.379 | y3       |
| 500.362 | y4       |
| 561.941 | b5-H2O   |

|         |                 |
|---------|-----------------|
| 576.267 | a9+2            |
| 637.517 | b10-2NH3+2      |
| 641.302 | b6-2H2O-NH3     |
| 676.146 | y11-3H2O-2NH3+2 |
| 694.089 | y11-H2O-2NH3+2  |
| 710.629 | y11-H2O+2       |
| 750.583 | y12-H2O-2NH3+2  |
| 771.3   | b7-2H2O         |
| 772.256 | b7-2H2O         |
| 776.221 | y12+2           |
| 789.397 | y13-3H2O-2NH3+2 |
| 807.382 | y13-2H2O-NH3+2  |
| 824.674 | y13-H2O+2       |
| 833.172 | y13+2           |
| 851.562 | y7              |
| 906.153 | y14-H2O+2       |
| 914.793 | y14+2           |
| 938.596 | y15-4NH3+2      |
| 972.255 | y16-3H2O-2NH3+2 |
| 1006.77 | y16-H2O+2       |
| 1015.77 | y16+2           |
| 1067.61 | y9              |
| 1113.66 | MH-H2O+2        |
| 1306.53 | b11-3H2O-2NH3   |
| 1309.85 | y10             |
| 1419.75 | y11-H2O         |
| 1437.88 | y11             |
| 1550.86 | y12             |
| 1607.6  | b13             |
| 1745.04 | b14             |
| 1857.96 | b15             |
| 1957.16 | b16             |
